# Supplementary material for: WITHDRAWN: From Phenomena to Accountability: A Mechanism-Driven Framework for Urban Road Traffic Emissions Management
Source: Research Square preprint supplement (doi:10.21203/rs.3.rs-7751217/v1), 2025-10-23
Supplement: Supplementary file 1 [file cf03e1e008459cb49f7f8989.docx]

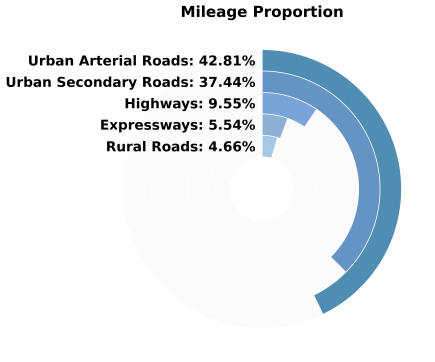

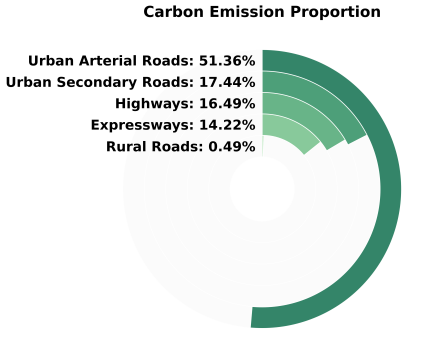

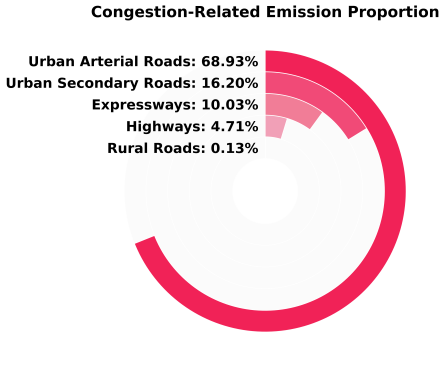


(a) (b) (c)

Supplementary Figure 1 Proportional Ring Charts of (a) Road Length, (b) Carbon Emissions, and (c) Congestion-Induced Emissions by Road Hierarchy


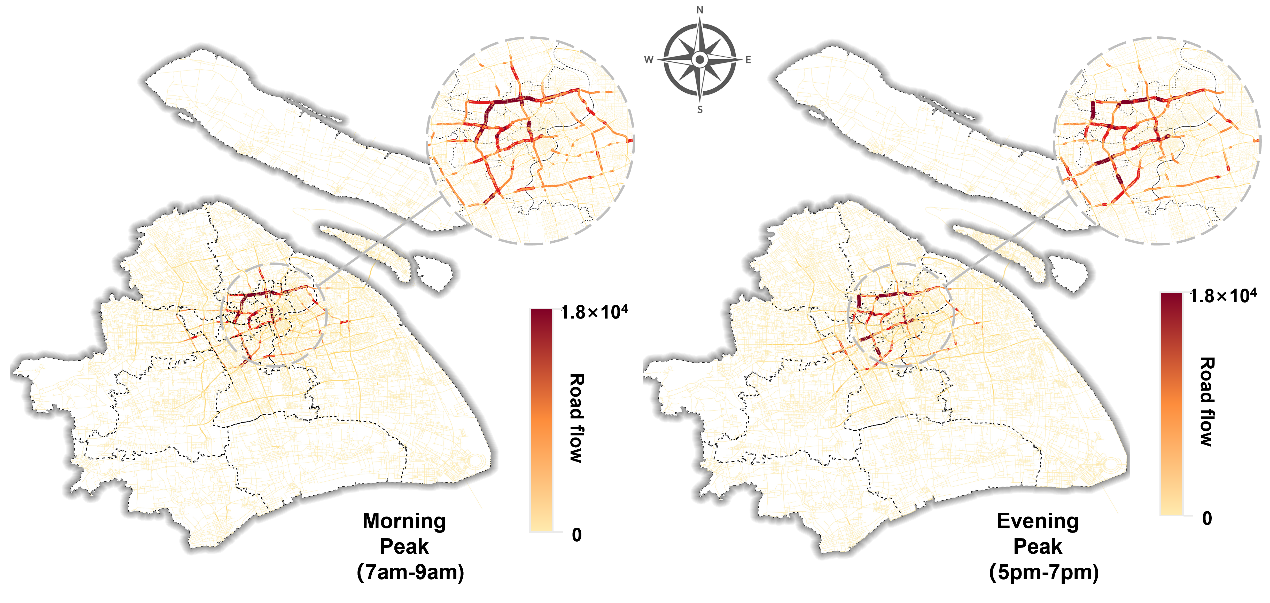


Supplementary Figure 2 Road Traffic Flow Distribution (a)Morning Peak (b)Evening Peak

**
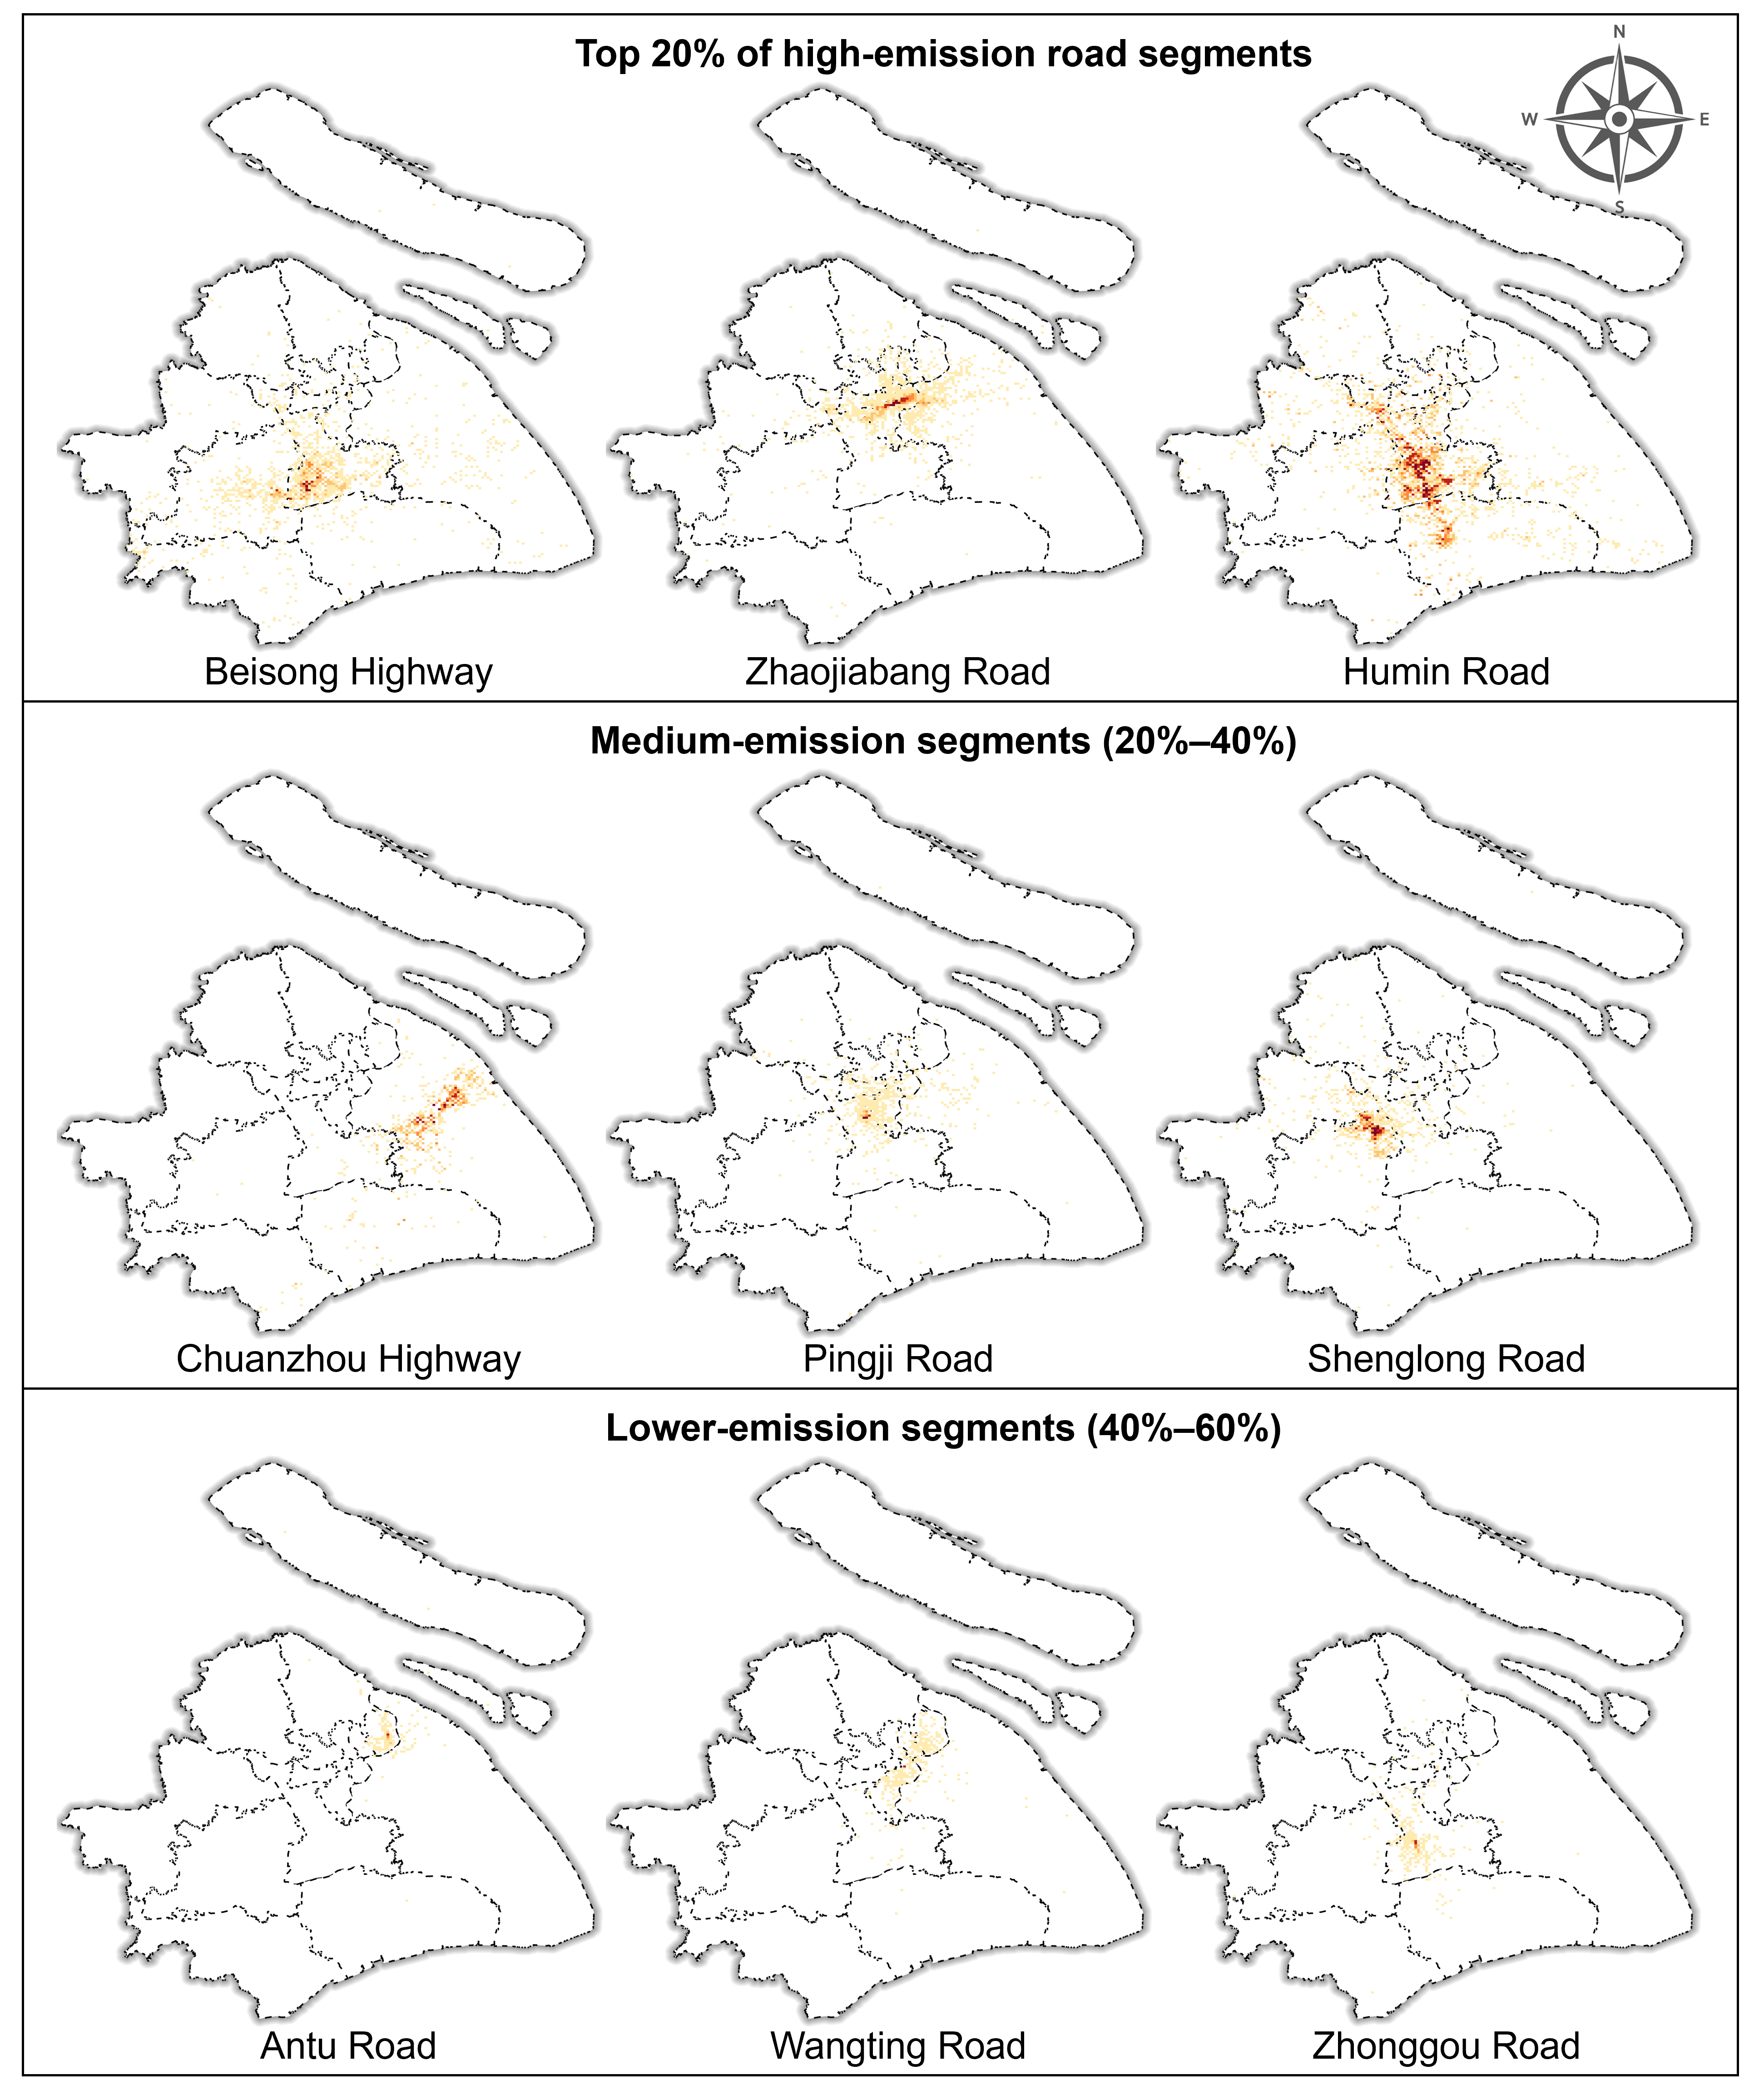
**

Supplementary Figure 3 Results of Road Carbon Emission Tracing


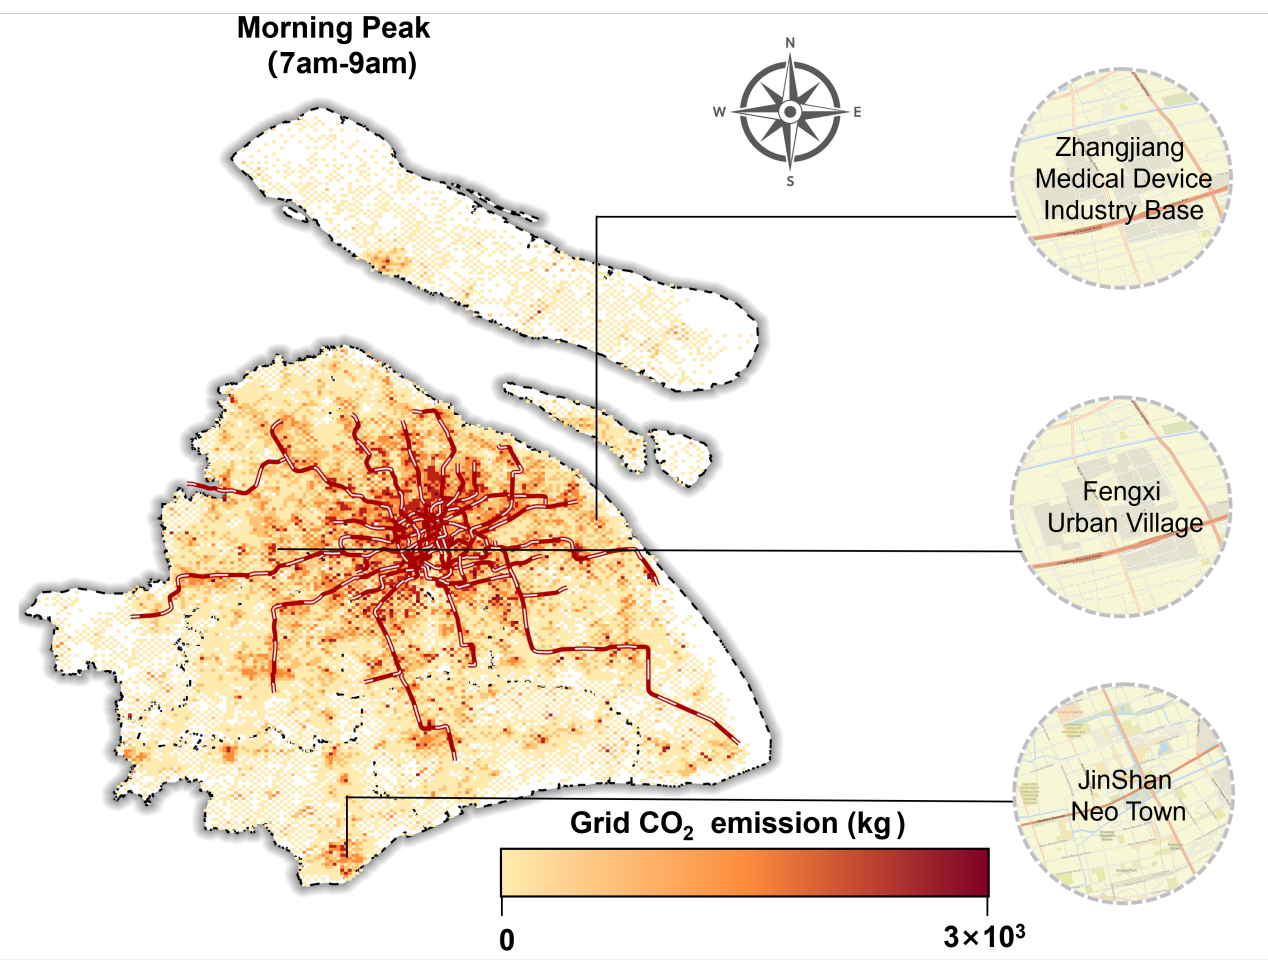


1. (b)

Supplementary Figure 4 Distribution of Origin Grid Carbon Emission Contributions (a)Morning Peak


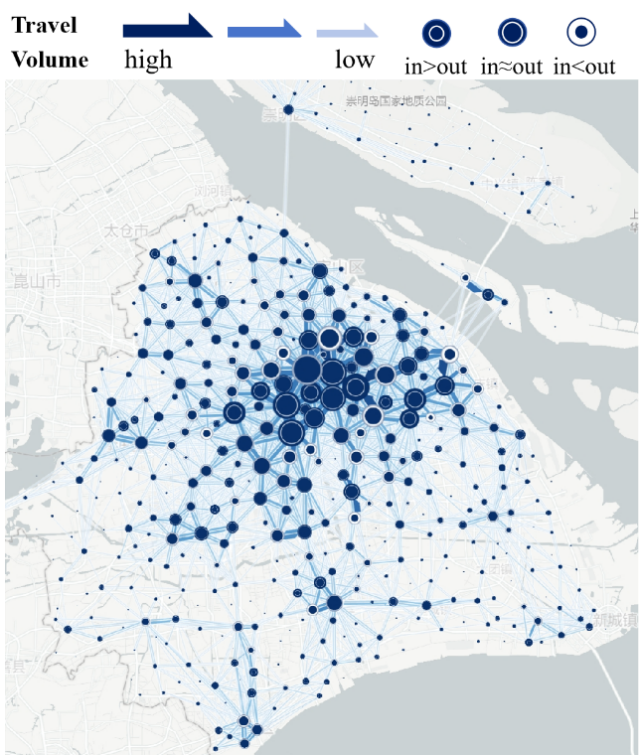

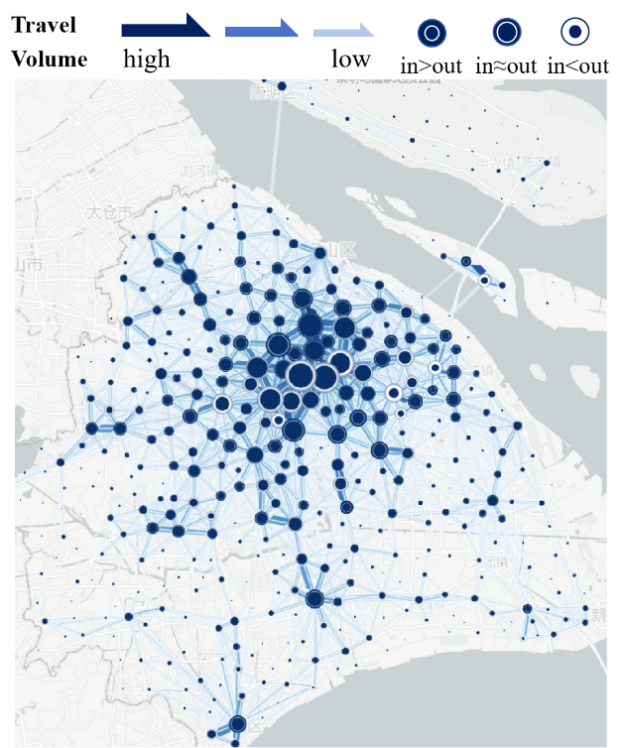


1. (b)

Supplementary Figure 5 Distribution of OD-based Travel Volumes (a)Morning Peak (b)Evening Peak


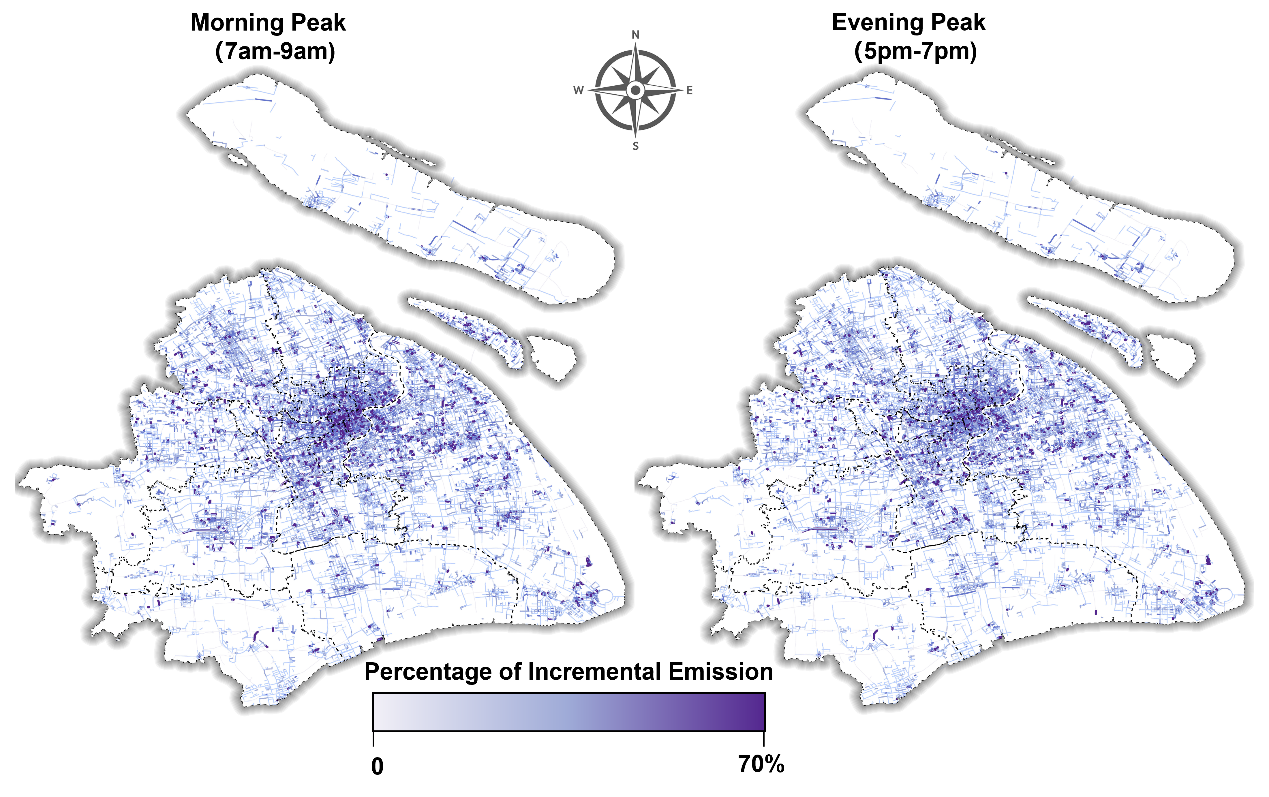


1. (b)

Supplementary Figure 6 Distribution of Incremental Road Carbon Emissions Ratios

(a)Morning Peak (b)Evening Peak


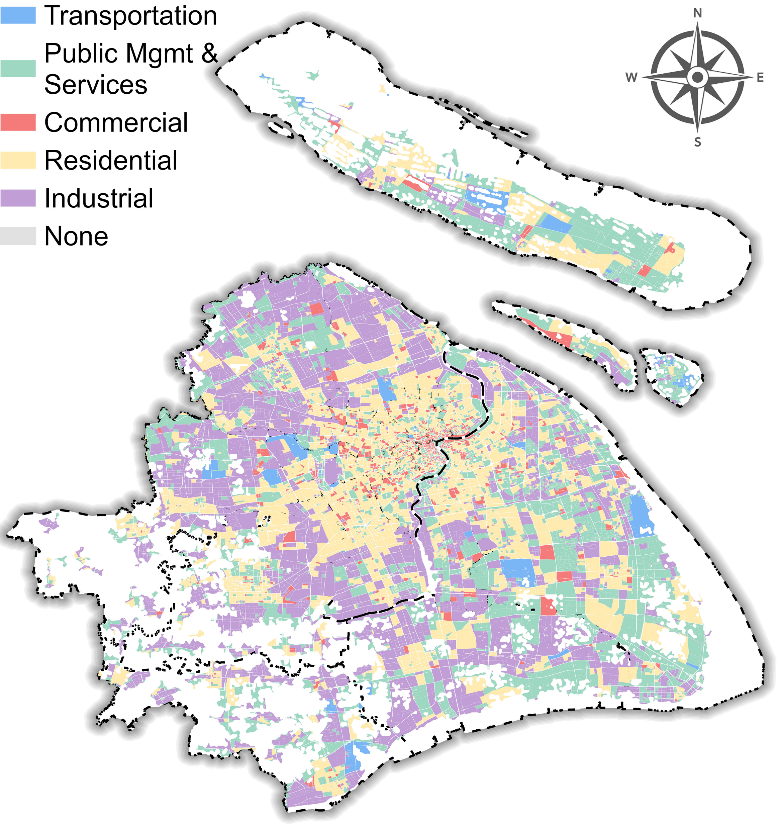


Supplementary Figure 7 Distribution of Land Use Types in Shanghai

Supplementary Table 1 pollutant-specific parameters 1

|  | a | b | c | d | e |
| --- | --- | --- | --- | --- | --- |
| FC | 217 | 9.6×10-2 | 0.253 | -4.12×10-4 | 9.65×10-3 |

1. Yan, L. *et al.* Quantifying and analyzing traffic emission reductions from ridesharing: A case study of Shanghai. *Transportation Research Part D: Transport and Environment* **89**, 102629 (2020).
